# Supplementary material for: Oxygen functionalized InSe and TlTe two-dimensional materials: transition from tunable bandgap semiconductors to quantum spin Hall insulators
Source: Royal Society of Chemistry journal article supplement (doi:10.1039/d3ra02518g), 2023-01-01
Supplement: d3ra02518g1.pdf [file d3ra02518g1.pdf]

**Supplementary Material: Oxygen functionalized InSe and TlTe two-dimensional materials: Transition from tunable bandgap semiconductors to quantum spin Hall insulators**

Qing Lu<sup>1</sup>, Lin Li<sup>1</sup>, Shilin Luo<sup>1</sup>, Yue Wang<sup>1</sup>, Busheng Wang<sup>\*2</sup> and Fu-Ti Liu<sup>\*1</sup>

<sup>1</sup>Key Laboratory of Computational Physics of Sichuan Province, Faculty of Science, Yibin University, Yibin 644000, China

<sup>2</sup>Department of Chemistry, State University of New York at Buffalo, Buffalo, NY 14260-3000, USA

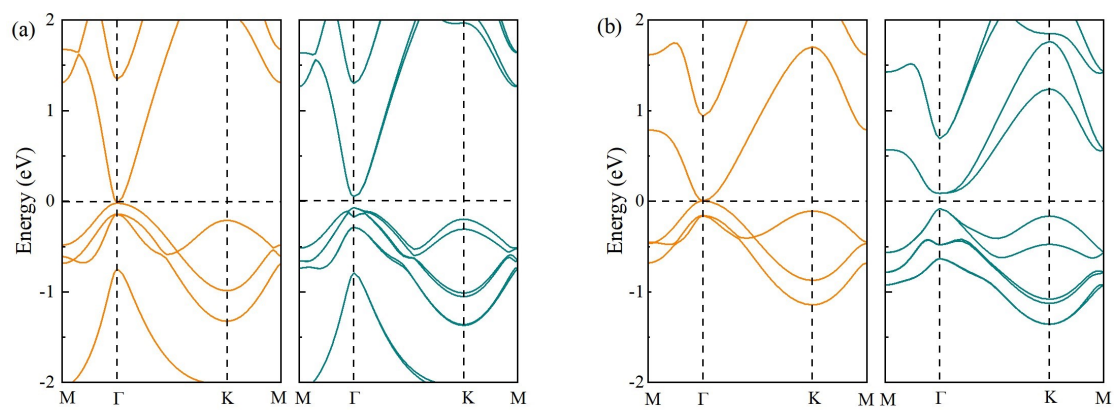

**Fig. S1.** Band structure of (a) InSeO and (b) TlTeO by HSE06. Orange and dark gray curves represent the band structures without and with SOC, respectively.

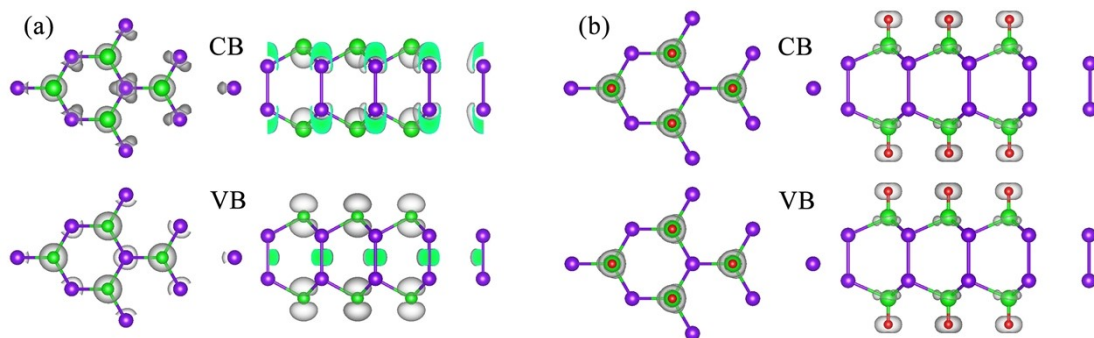

**Fig. S2.** The partial charge densities of the conduction band bottom (CB) and valence band top (VB) of InSe and InSeO, respectively (top and side views). The blue, green and red balls represent In, Se and O atoms respectively.

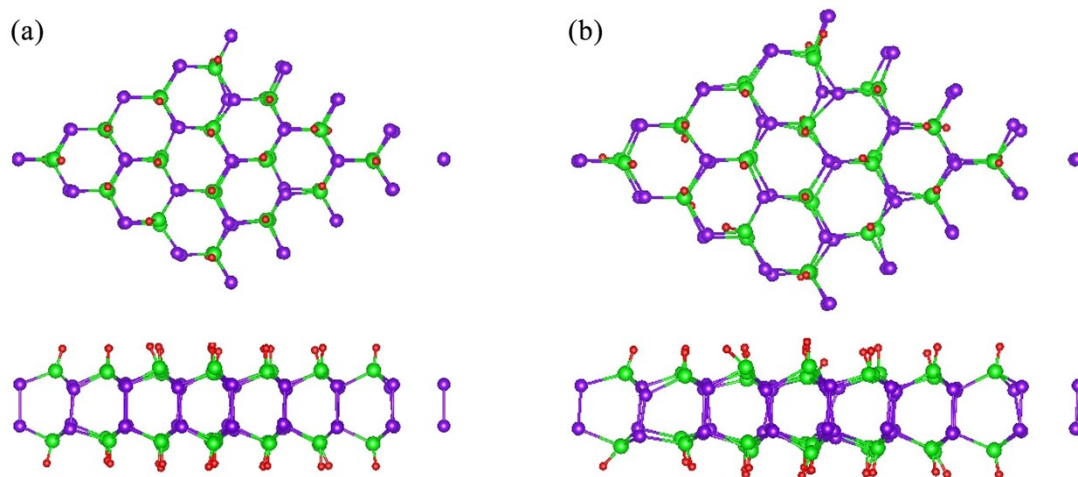

**Fig. S3.** The snapshot of atomic configuration of (a) InSeO and (b) TlTeO at 300 K. Neither structure reconstruction nor structure disruption appeared in InSeO and TlTeO.
